# Supplementary material
Source: PubMed Central journal article supplement (PMC4675836)
Supplement: supp_kfv198_toxsci-15-0362-File008.pdf [file supp_kfv198_toxsci-15-0362-File008.pdf]

**Supplemental data S1.** MS/MS data and notes concerning identifications of metabolites listed in Table 5 and Table 6. Readers should note that the analytical platform was optimized for reproducible ion detection under high-throughput conditions. There was no specific optimization for any of the ions detected to provide a realistic test of the utility of high-throughput analysis for quantification. The amino acid identifications and some of the other metabolites quantified here have been documented in previous publications and minimal repetition is provided for these. For the remainder, identification has been based upon multiple criteria. For most, coelution and MS/MS of ions in plasma consistent with retention time and MS/MS of authentic reference material provides evidence for correct identification; details are provided below. For some, additional verification is provided by agreement of abundance measurements with independent analyses of same samples Metabolon. For some, additional evidence is provided by correlation of ion intensities for multiple ions. For some, the accurate mass peak was readily apparent but the low ion intensity and presence of interfering ions within the isolation window prevented direct verification, but ionization in negative ESI provided MS/MS spectra, which were unambiguous.

| Metabolite                    | ion              | <i>m/z</i> | RT (s) |
|-------------------------------|------------------|------------|--------|
| <b>Metabolites of Table 5</b> |                  |            |        |
| N8-Acetylspermidine           | H <sup>+</sup>   | 188.1751   | 38     |
| Betaine                       | H <sup>+</sup>   | 118.0857   | 47     |
| Bilirubin                     | H <sup>+</sup>   | 585.2675   | 181    |
| Carnitine                     | H <sup>+</sup>   | 162.1117   | 41     |
| Choline                       | H <sup>+</sup>   | 104.1064   | 44     |
| Cortisol                      | H <sup>+</sup>   | 363.2149   | 96     |
| Cotinine                      | H <sup>+</sup>   | 177.1014   | 234    |
| Creatinine                    | H <sup>+</sup>   | 114.0657   | 40     |
| Glucose                       | Na <sup>+</sup>  | 203.0518   | 45     |
| Hypoxanthine                  | H <sup>+</sup>   | 137.0458   | 46     |
| 3-Indolepropionic acid        | H <sup>+</sup>   | 190.0853   | 156    |
| Kynurenine                    | H <sup>+</sup>   | 209.0914   | 51     |
| 1-Methyl-histidine            | H <sup>+</sup>   | 170.0925   | 33     |
| Oleic acid                    | H <sup>+</sup>   | 283.2645   | 555    |
| Oxoproline                    | H <sup>+</sup>   | 130.0499   | 46     |
| Uric acid                     | H <sup>+</sup>   | 169.0349   | 47     |
| Uridine                       | H <sup>+</sup>   | 245.0759   | 47     |
| <b>Metabolites of Table 6</b> |                  |            |        |
| Caffeine                      | H <sup>+</sup>   | 195.0877   | 35     |
| Chlorobenzoic acid            | H <sup>+</sup> * | 157.0051   | 59     |
| Chlorophenylacetic acid       | H <sup>+</sup> * | 171.0206   | 64     |
| Chlorsulfuron                 | H <sup>+</sup>   | 358.0371   | 345    |
| Dibutylphthalate              | H <sup>+</sup>   | 279.1580   | 391    |
| Dipropylphthalate             | H <sup>+</sup>   | 251.1266   | 280    |
| Hippuric acid                 | H <sup>+</sup>   | 180.0657   | 140    |
| Octylphenol                   | H <sup>+</sup> * | 207.1734   | 282    |

|                                   |                |          |     |
|-----------------------------------|----------------|----------|-----|
| Pirimicarb                        | H <sup>+</sup> | 239.1483 | 552 |
| Styrene                           | H <sup>+</sup> | 105.0693 | 298 |
| Tetraethylene glycol              | H <sup>+</sup> | 195.1211 | 38  |
| Triethylphosphate                 | H <sup>+</sup> | 183.0773 | 329 |
| Triphenylphosphate                | H <sup>+</sup> | 327.0765 | 359 |
| Tris(2-chloropropyl)<br>phosphate | H <sup>+</sup> | 327.0081 | 330 |
| Xyllycarb                         | H <sup>+</sup> | 180.1018 | 264 |

\*Note: These metabolites were confirmed in using negative mode ionization due to low abundance of parent ion in positive mode.

### **MS/MS Confirmation**

The identity of the metabolites was verified by comparing spectra obtained using ion dissociation to authentic reference standards and/or spectra available in the MassBank database (<http://www.massbank.jp/index.html>). Spectra of parent ions selected for confirmation were obtained on a Thermo LTQ-FTICR or Thermo Fusion high resolution mass spectrometer. Data were collected using collision induced disassociation (CID) or high energy C-trap disassociation (HCD). The spectra obtained were first deprofiled using the *deprofile.scan* (Stravs et al. 2013) function in the R package RMassBank and spectra were compared to determine the similarity score by the *SpectrumSimilarity* (Dodder 2014) function in the R package OrgMassSpecR.

1. Stravs MA, Schymanski EL, Singer H, Hollender J. (2013) Automatic Recalibration and Processing of Tandem Mass Spectra using Formula Annotation, *Journal of Mass Spectrometry*, 48(1), 89-99.
2. Nathan G. Dodder and with code contributions from Katharine M. Mullen. (2014) OrgMassSpecR: Organic Mass Spectrometry. R package version 0.4-4. <http://CRAN.R-project.org/package=OrgMassSpecR>

**N8-Acetylspermidine** ( $H^+$ ,  $m/z$  188.1751, 38s)

Acetylspermidine was confirmed by MS/MS and retention time relative to authentic standard as previously described (Roede JR, Uppal K, Park Y, Lee K, Tran V, Walker D, Strobel FH, Rhodes SL, Ritz B, Jones DP. (2013) Serum metabolomics of slow vs. rapid motor progression Parkinson's disease: a pilot study. *PLoS One*, 8: e77629.

**Betaine (H<sup>+</sup>, m/z 118.0857, 47s)**

Betaine was confirmed by coelution and MS/MS matching standard. Double-blind independent analysis (Emory platform vs Metabolon) on 50 marmoset samples showed a significant association with Pearson r= 0.80.

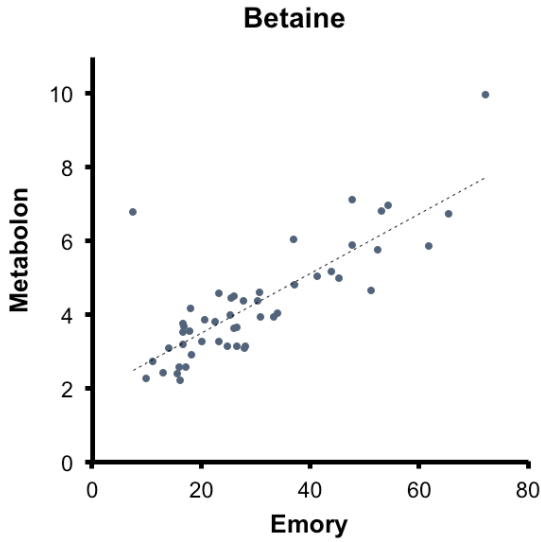

**Betaine M+H, m/z = 118.0857**

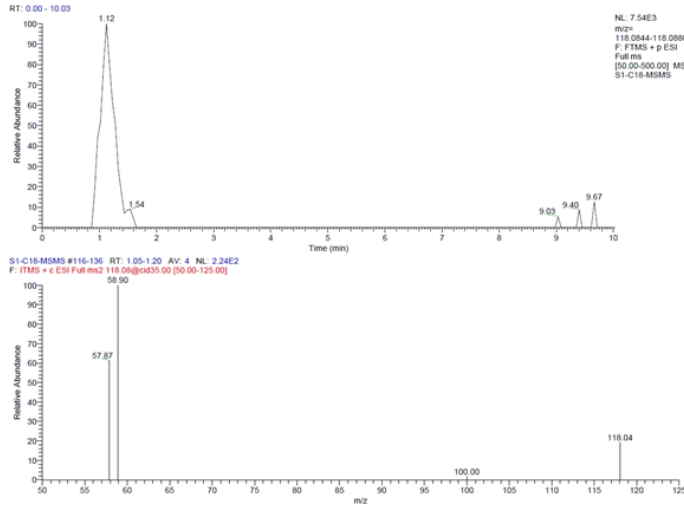

**MS/MS spectra**  
Spectrum similarity score: 0.792

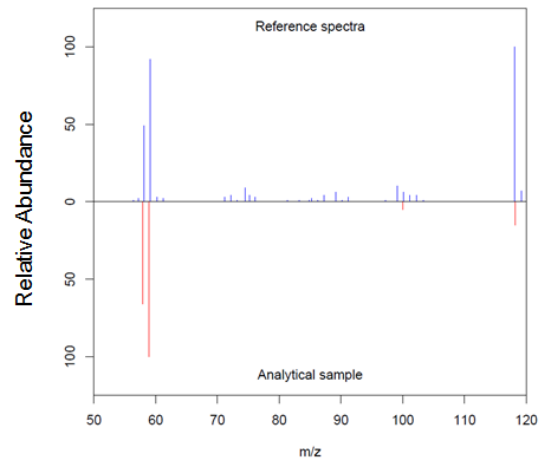

Reference spectra source: <http://www.massbank.jp/jsp/Dispatcher.jsp?type=disp&id=MT000002&site=12>

## Bilirubin ( $H^+$ , $m/z$ 585.2675, 181s)

Bilirubin was confirmed by retention time and MS/MS relative to standard (QStd); values reported for bilirubin by Metabolon correlated with the accurate mass ion for biliverdin.

### Bilirubin M+H, $m/z$ = 585.2675

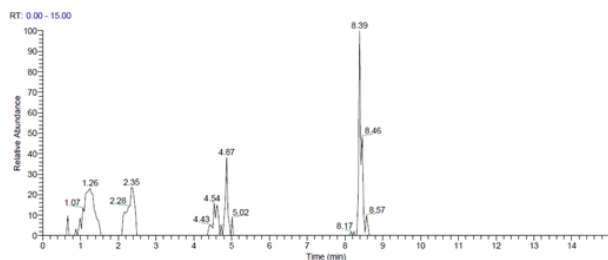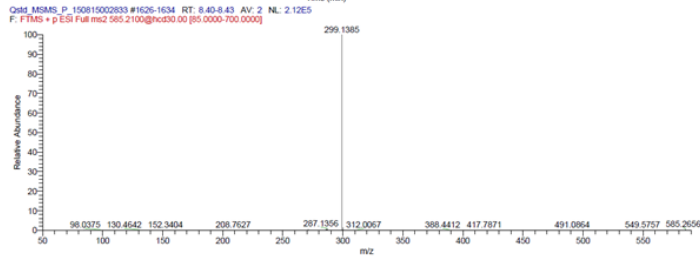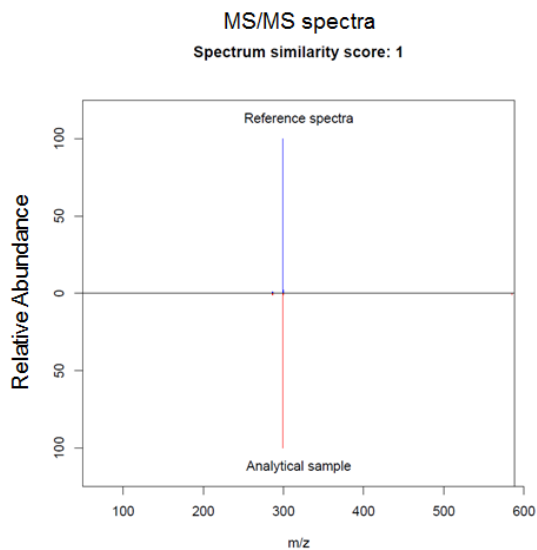

Reference spectra obtained on Thermo LTQ FTICR, Bilirubin (98%), Sigma Aldrich

## Carnitine ( $H^+$ , $m/z$ 162.1117, 41s)

Carnitine was confirmed by coelution and MS/MS matching standard. A coeluting ion with  $m/z$  144.1013, consistent with the  $-H_2O (+H^+)$  was also present and appeared suitable for quantification.

### Carnitine M+H, $m/z = 162.1117$

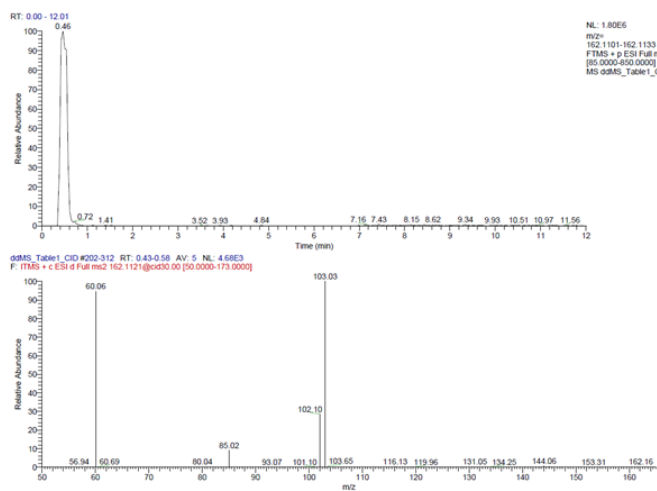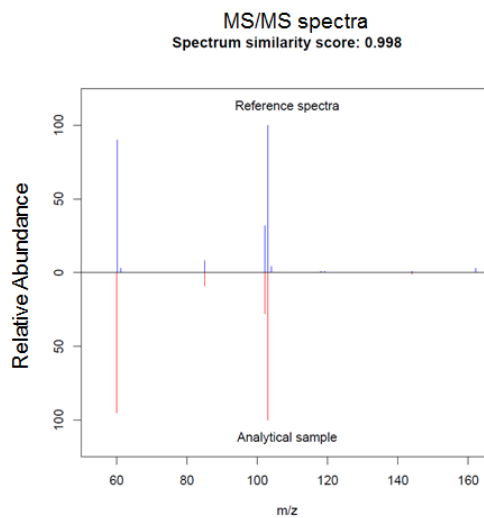

Reference spectra source: <http://www.massbank.jp/jsp/Dispatcher.jsp?type=disp&id=MT000082&site=12>

## Choline ( $H^+$ , $m/z$ 104.1064, 44s)

Choline was confirmed by coelution and MS/MS matching standard. Double-blind independent analysis (Emory platform vs Metabolon) on 50 marmoset samples showed a significant association with Pearson  $r = 0.71$ . Additional studies of choline are available (Uppal K, Soltow QA, Promislow DEL, Wachtman L, Quyyumi AA, Jones DP. (2015) MetabNet: an R package for metabolic association analysis of high-resolution metabolomics data. *Frontiers in Bioengineering and Biotechnology*, 3: 87.

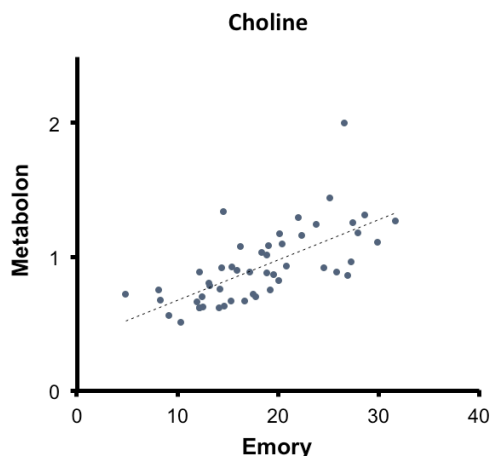

## Choline M+H, $m/z = 104.1064$

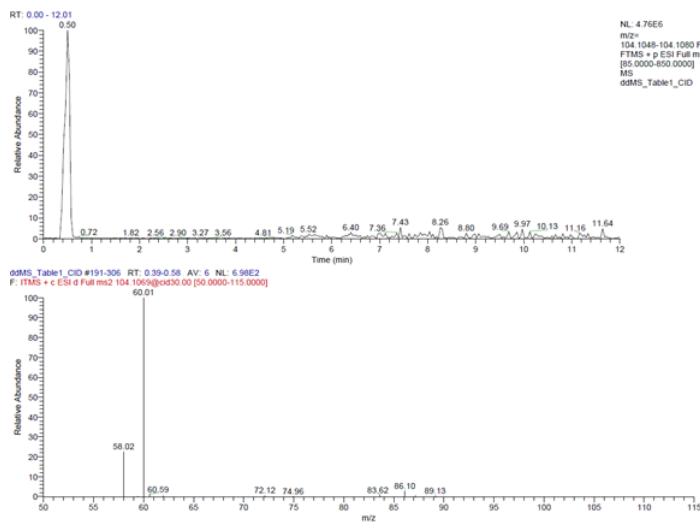

## MS/MS spectra Spectrum similarity score: 0.942

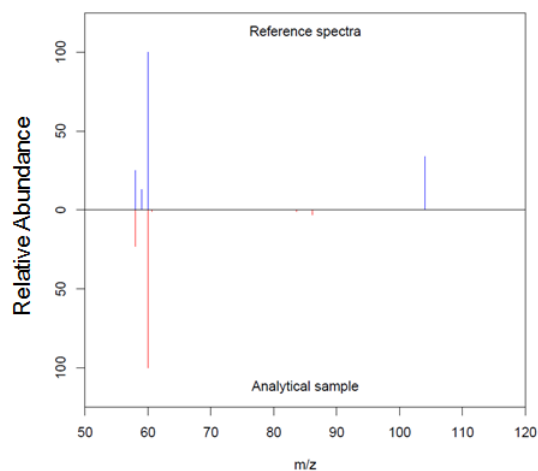

Reference spectra source: <http://www.massbank.jp/jsp/Dispatcher.jsp?type=disp&id=PB001603&site=9>

## Cortisol ( $H^+$ , $m/z$ 363.2149, 96s)

Cortisol was confirmed by coelution and MS/MS matching standard. Double-blind independent analysis (Emory platform vs Metabolon) on 50 marmoset samples showed a significant association with Pearson  $r = 0.69$ .

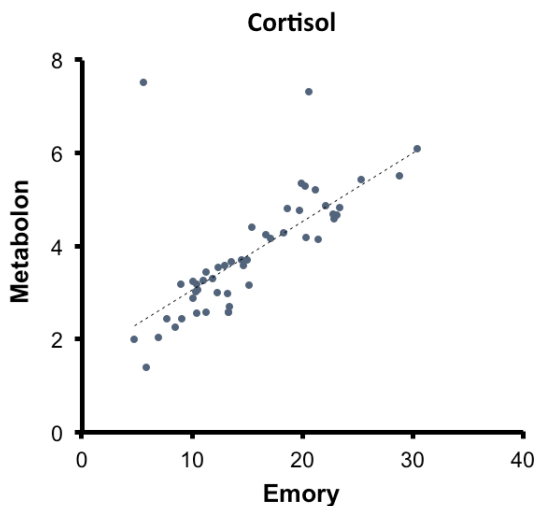

## Cortisol M+H, $m/z = 363.2149$

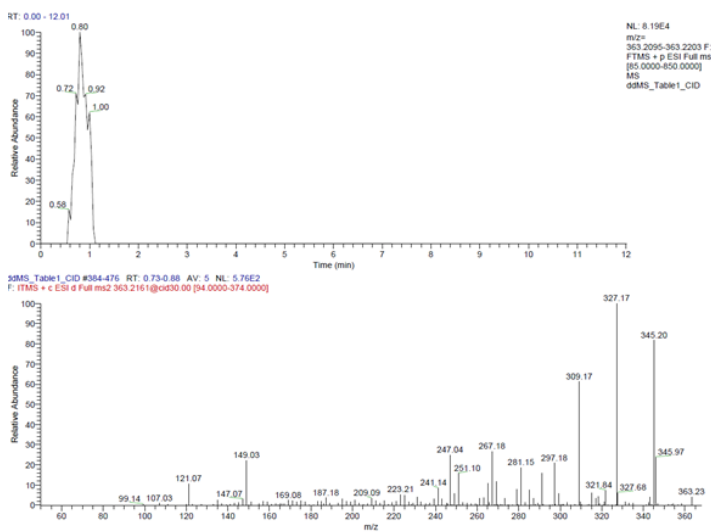

## MS/MS spectra Spectrum similarity score: 0.783

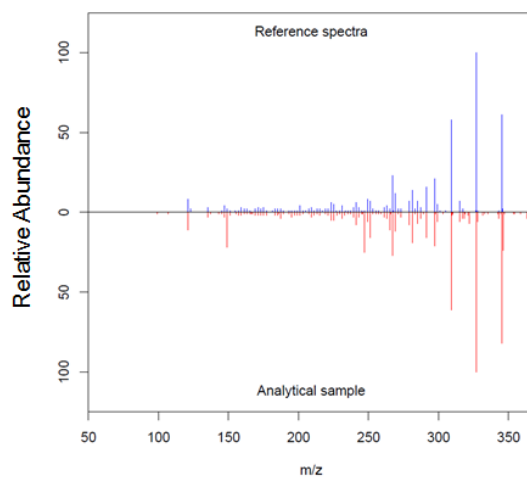

Reference spectra obtained on Thermo Fusion, Cortisol CRM, Sigma Aldrich



## Cotinine ( $H^+$ , $m/z$ 177.1014, 234s)

Cotinine was confirmed by coelution and MS/MS matching standard. This was a non-smoking population so cotinine concentrations were low; in other analyses of smokers plasma with the same platform, the signal for cotinine correlated (Pearson  $r=0.56$ ) with hydroxycotinine ( $m/z$  193.0966, 174 s).

### Cotinine M+H, $m/z = 177.1022$

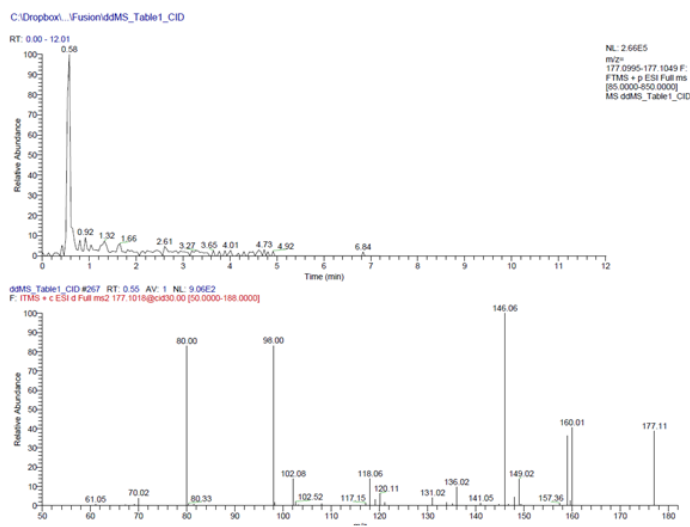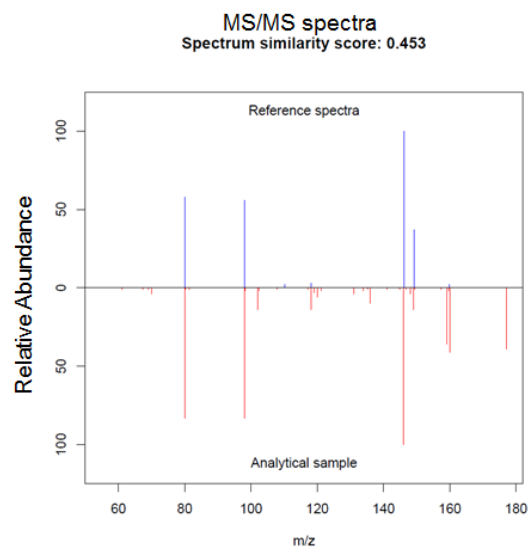

Reference spectra obtained on Thermo LTQ FTICR, Cotinine (98%), SigmaAldrich

## Creatinine ( $H^+$ , $m/z$ 114.0657, 40s)

Creatinine was confirmed by coelution and MS/MS matching standard. Double-blind independent analysis (Emory platform vs Metabolon) on 50 marmoset samples showed a significant association with Pearson  $r = 0.55$ .

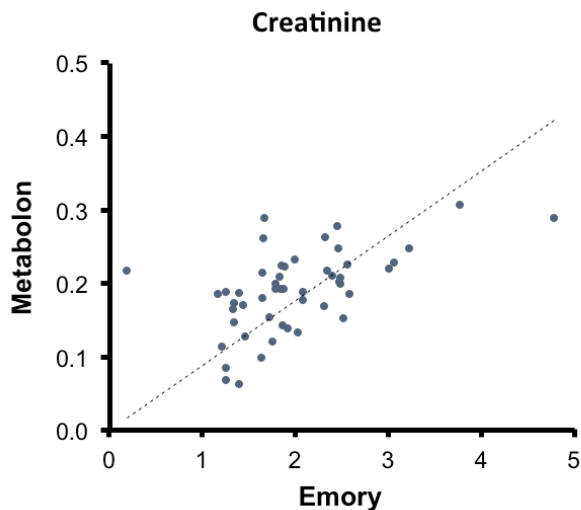

## Creatinine M+H, $m/z = 114.0657$

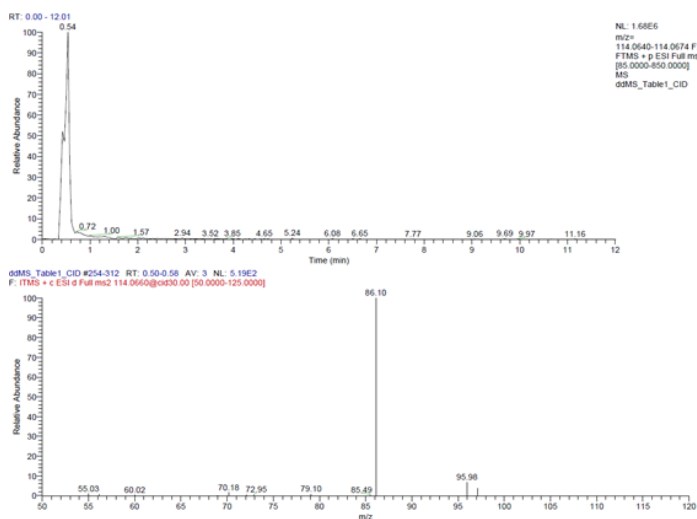

## MS/MS spectra Spectrum similarity score: 0.997

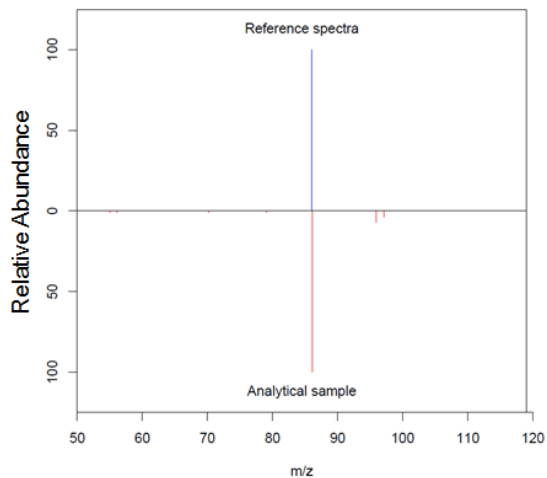

Reference spectra source: <http://www.massbank.jp/isp/Dispatcher.jsp?type=disp&id=UF412504&site=27>

Glucose (Na<sup>+</sup>, m/z 203.0518, 45s)

Glucose was confirmed by coelution and MS/MS matching standard. Double-blind independent analysis (Emory platform vs Metabolon) on 50 marmoset samples showed a significant association with Pearson r= 0.86.

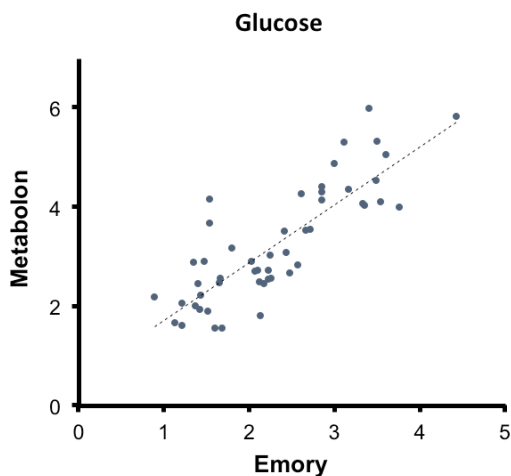

Glucose M+Na, m/z = 203.0518

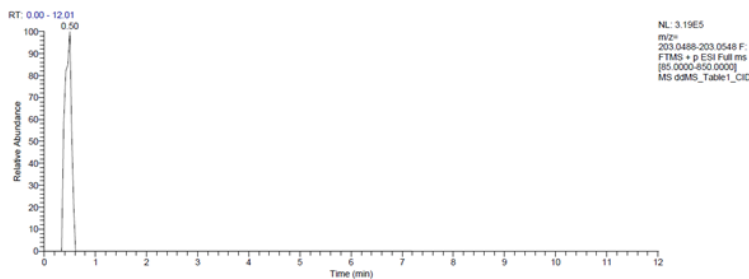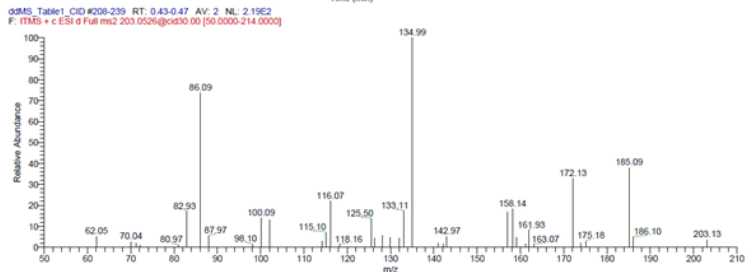

**MS/MS spectra**  
Spectrum similarity score: 0.873

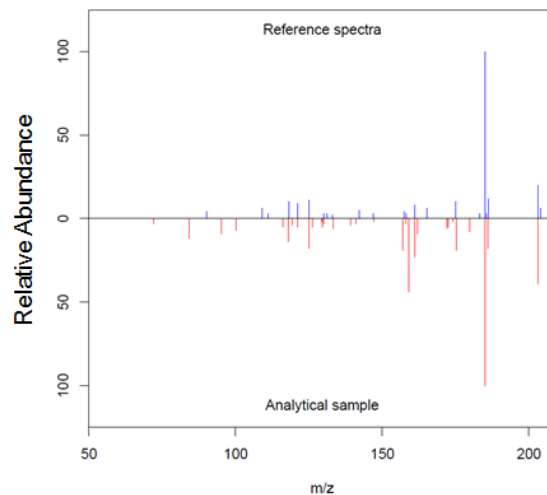

Reference spectra obtained on Thermo Fusion, Glucose (96%), Sigma Aldrich

**Hypoxanthine (H+, m/z 137.0458, 46s)**

Hypoxanthine was confirmed by coelution and MS/MS matching standard. Double-blind independent analysis (Emory platform vs Metabolon) on 50 marmoset samples showed a significant association with Pearson r= 0.95.

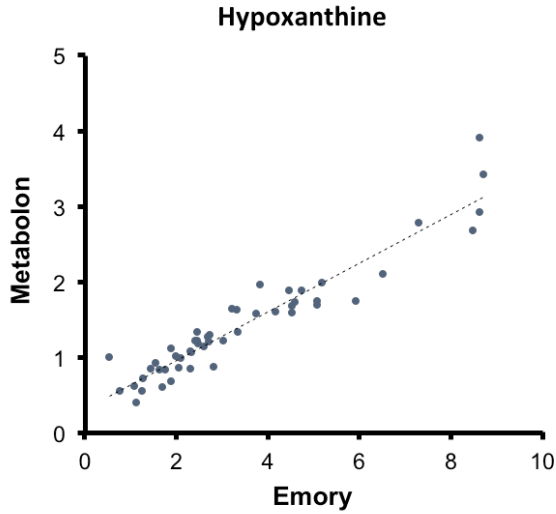

**Hypoxanthine M+H, m/z = 137.0458**

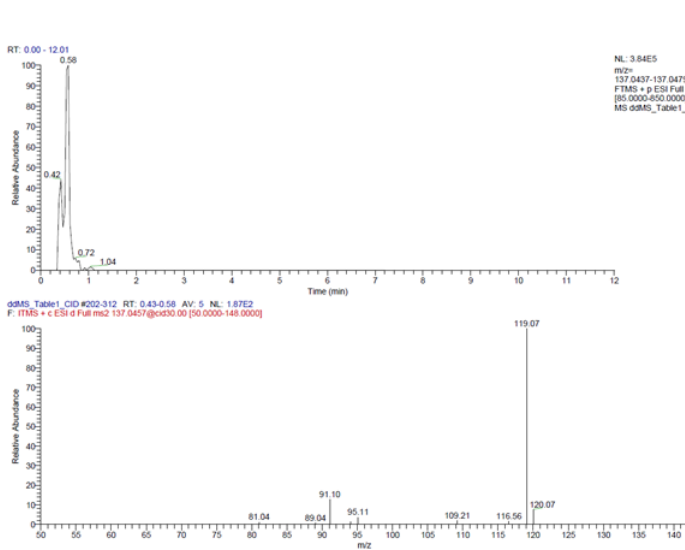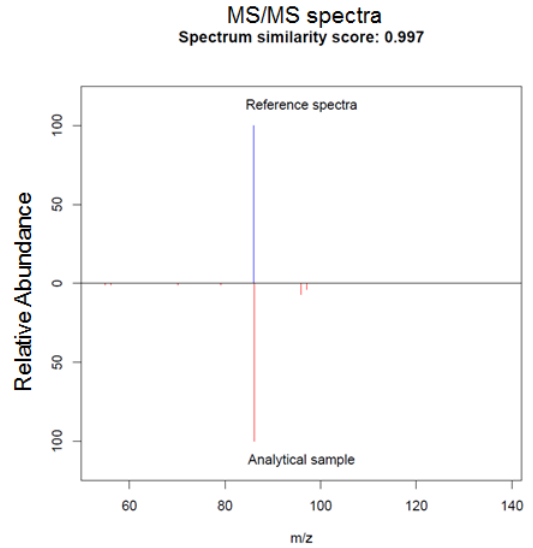

Reference spectra obtained on Thermo Fusion, Hypoxanthine (99%), Sigma Aldrich

### 3-Indolepropionic acid ( $H^+$ , $m/z$ 190.0853, 156s)

Indole was confirmed by coelution and MS/MS matching standard. Double-blind independent analysis (Emory platform vs Metabolon) on 50 marmoset samples showed a significant association with Pearson  $r = 0.67$ .

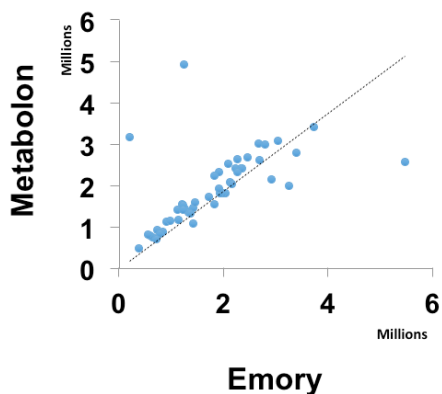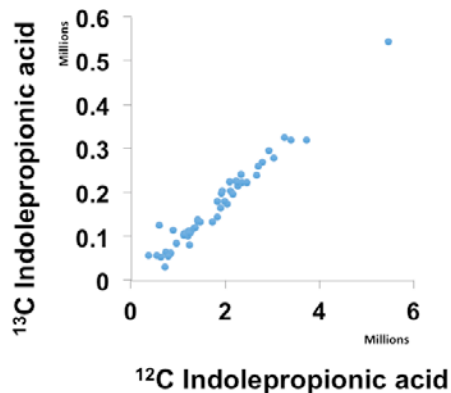

### 3-Indolepropionic Acid M+H, $m/z = 190.0853$

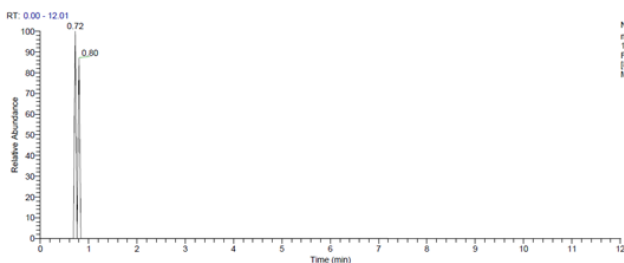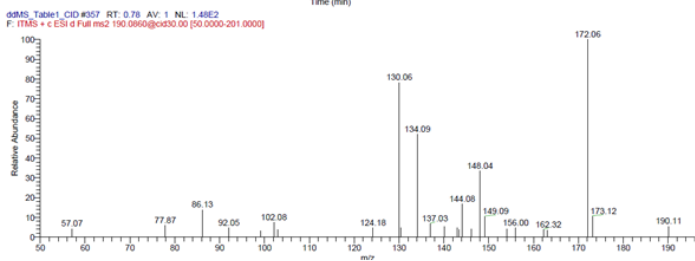

### MS/MS spectra Spectrum similarity score: 0.578

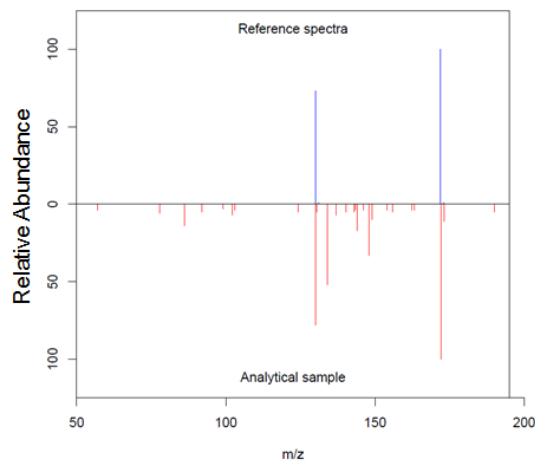

Reference spectra obtained on Thermo Fusion, Indole propionate (99%), SigmaAldrich

**Kynurenine** ( $H^+$ ,  $m/z$  209.0914, 51s)

Kynurenine was confirmed by coelution and MS/MS matching standard. Double-blind independent analysis (Emory platform vs Metabolon) on 50 marmoset samples showed a significant association with Pearson  $r = 0.80$ .

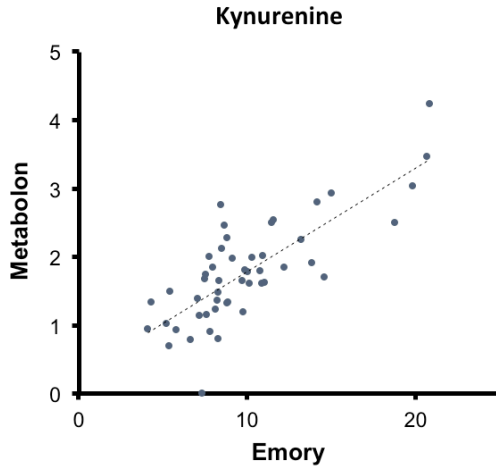

**Kynurenine M+H,  $m/z = 209.0914$**

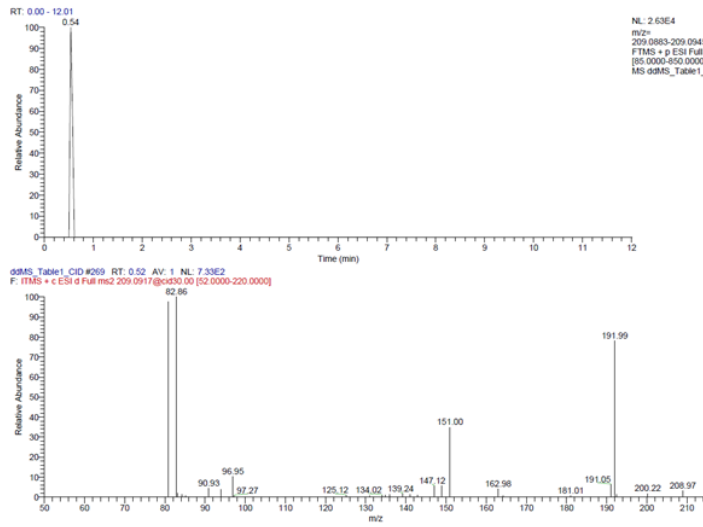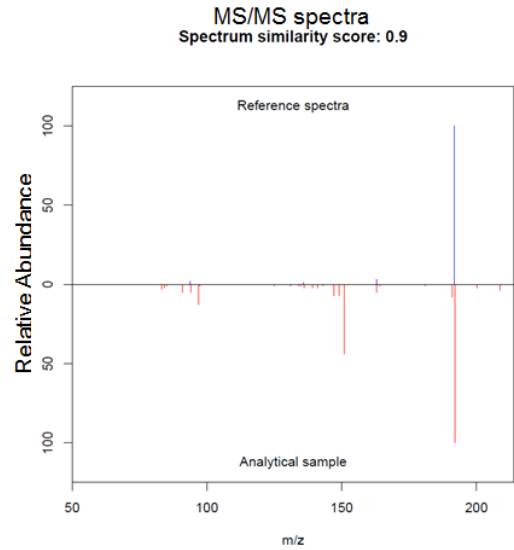

Reference spectra obtained on Thermo Fusion, Kynurenine (98%), Sigma Aldrich

## 1-Methylhistidine ( $H^+$ , $m/z$ 170.0925, 33s)

1-Methylhistidine was confirmed by coelution and MS/MS matching standard. In other studies using this protocol, a correlating signal consistent with the  $2Na^+-H^+$  form ( $m/z$  170.0913) is also present and also appears suitable for quantification. Note that another low-intensity signal is present consistent with 3-methylhistidine.

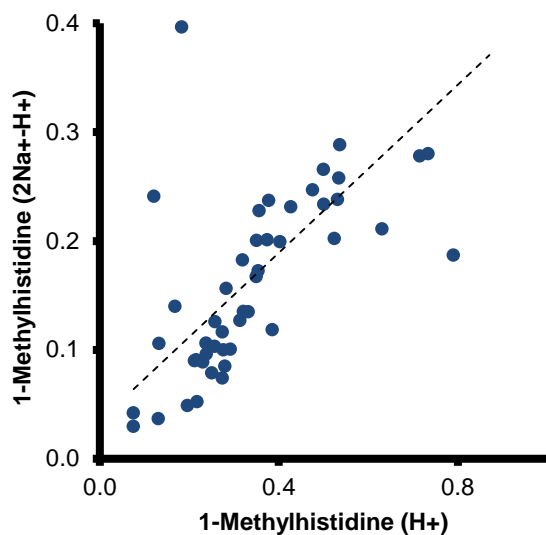

## 1-Methyl-histidine M+H, $m/z$ = 170.0925

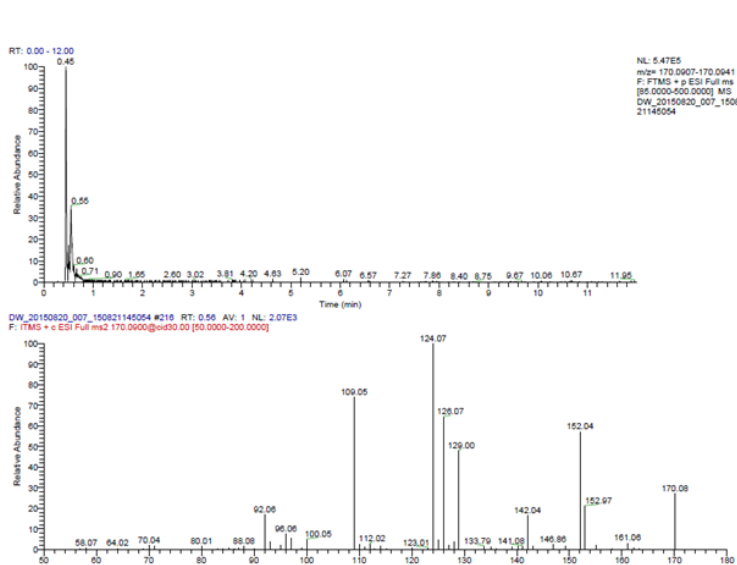

MS/MS spectra  
Spectrum similarity score: 0.653

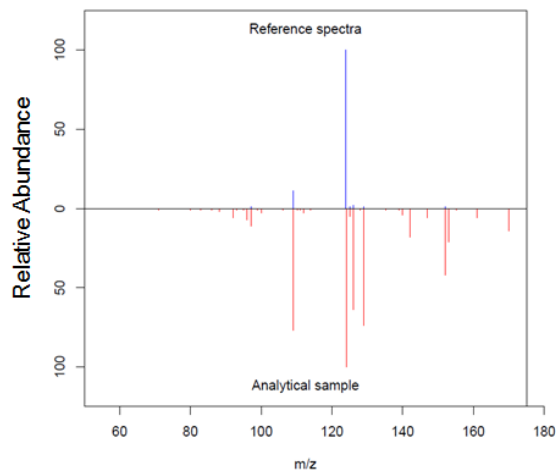

Reference spectra obtained on Thermo LTQ FTICR, 1-methyl-histidine (98%), SigmaAldrich

**Oleic acid ( $H^+$ ,  $m/z$  283.2645, 555s)**

Oleic acid was confirmed by coelution and MS/MS matching standard.

**Oleic Acid M+H,  $m/z$  = 283.2645**

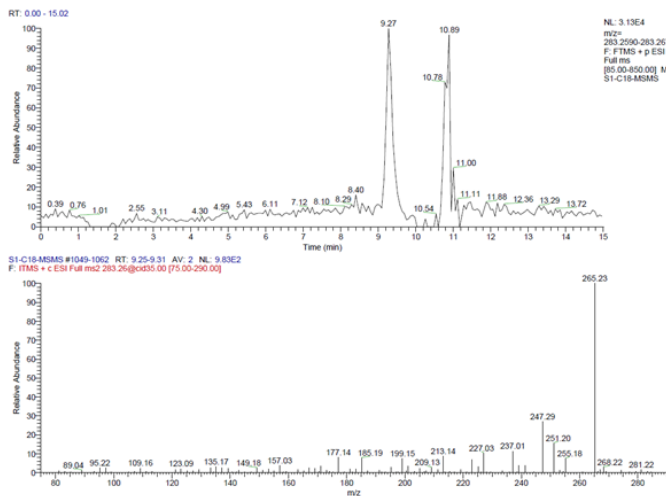

MS/MS spectra  
Spectrum similarity score: 0.616

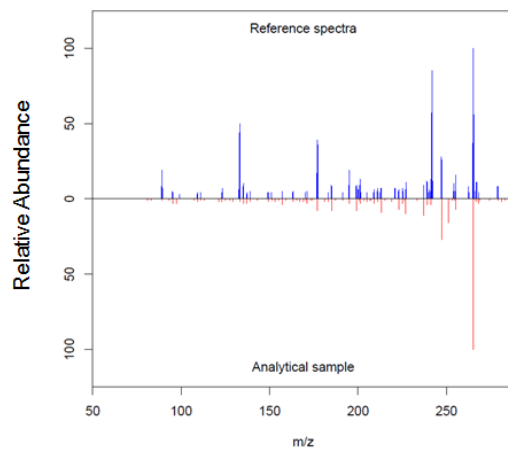

Reference spectra obtained on Thermo Fusion, Oleic acid (99%), SigmaAldrich



## Oxoproline ( $H^+$ , $m/z$ 130.0499, 46s)

Oxoproline was confirmed by coelution and MS/MS matching standard. Double-blind independent analysis (Emory platform vs Metabolon) on 50 marmoset samples showed a significant association with Pearson  $r = 0.69$ .

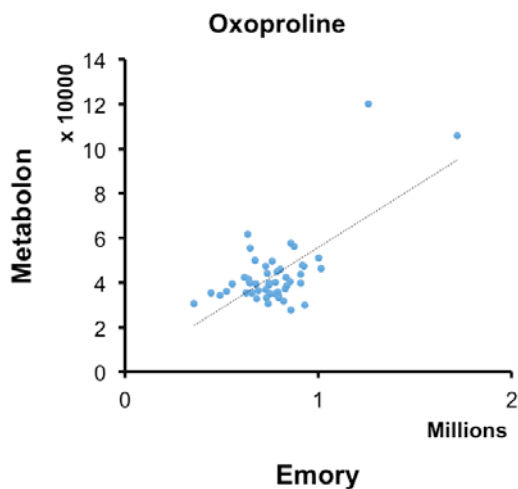

## Oxoproline M+H, $m/z = 130.0499$

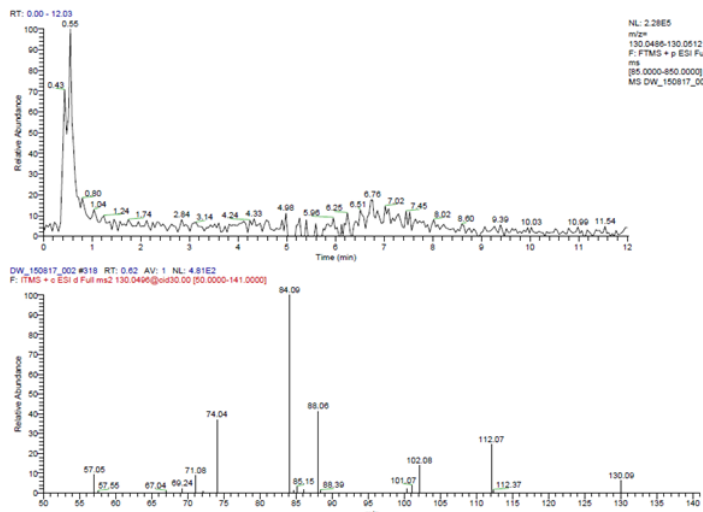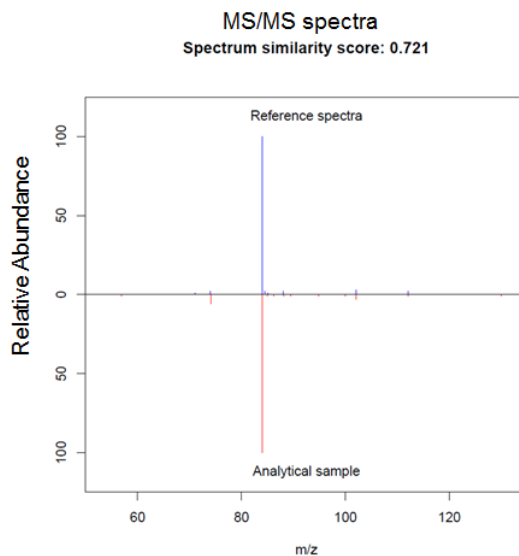

Reference spectra obtained on Thermo Fusion, Oxoproline (99%), SigmaAldrich

Uric acid ( $H^+$ ,  $m/z$  160.0349, 47s)

Uric acid was confirmed by coelution and MS/MS matching standard. Double-blind independent analysis (Emory platform vs Metabolon) on 50 marmoset samples showed a significant association with Pearson  $r = 0.87$ .

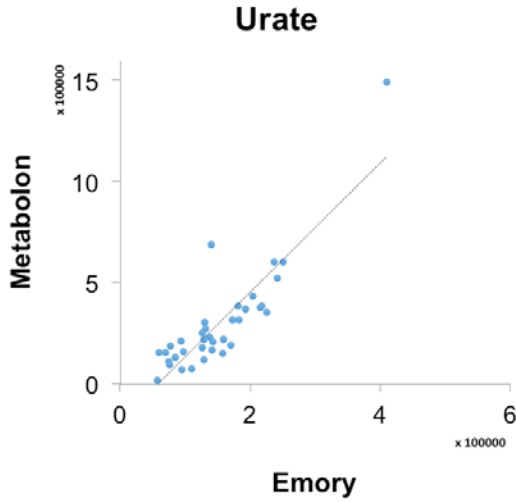

Uric acid M+H,  $m/z = 169.0349$

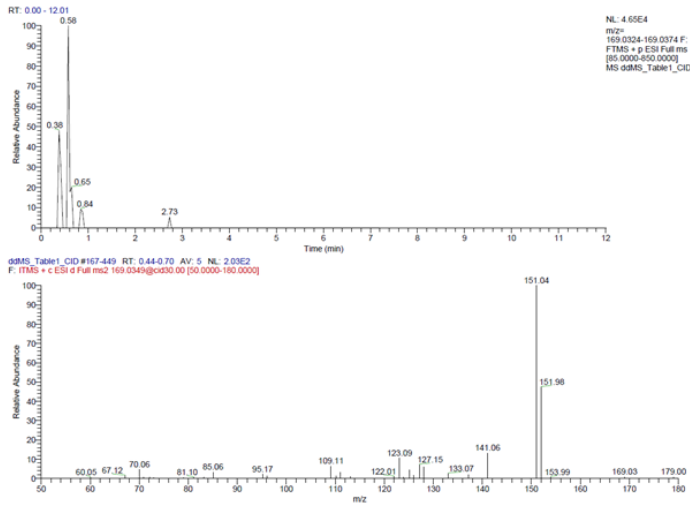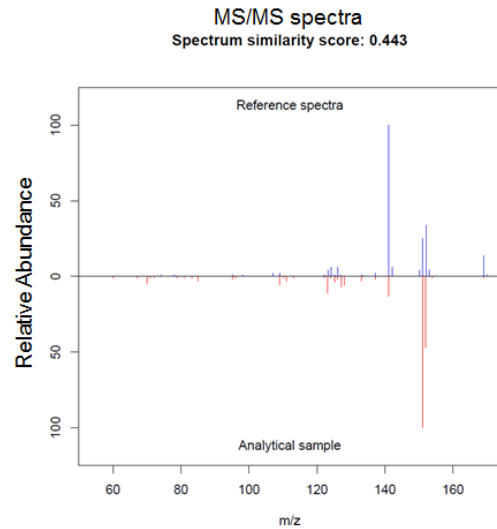

Reference spectra source: <http://www.massbank.jp/jsp/Dispatcher.jsp?type=disp&id=MT000083&site=12>

Uridine ( $H^+$ ,  $m/z$  245.0759, 47s)

Uridine was confirmed by coelution and MS/MS matching standard. Metabolon measurement of uridine more strongly correlated with our measurement of uracil ( $r=0.59$ ) than with our measurement of uridine ( $r=0.51$ ). Our measurements of uracil and uridine had Pearson  $r=-0.62$ , supporting correct identification.

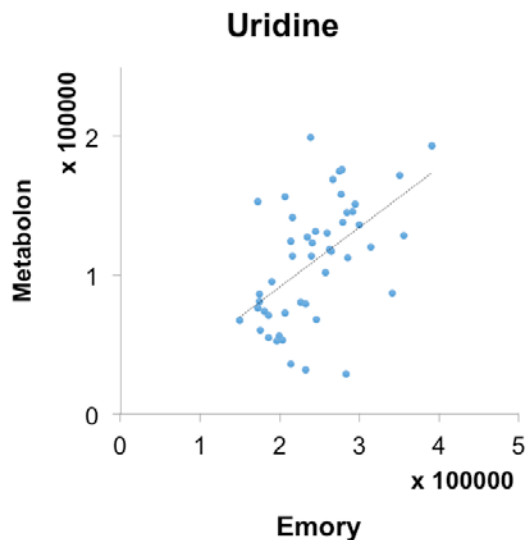

Uridine M+H,  $m/z = 245.0759$

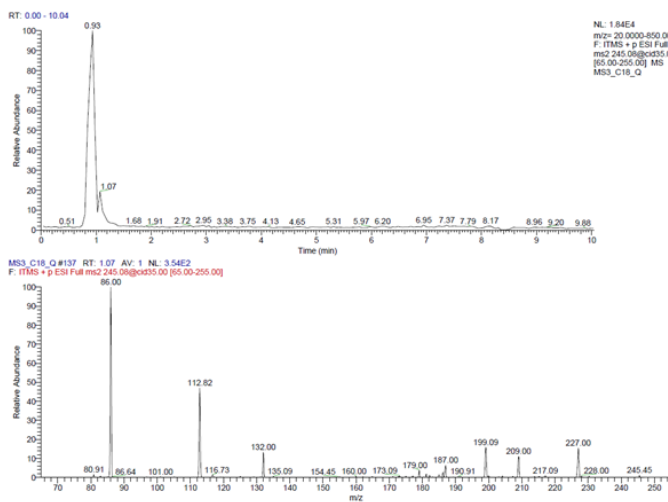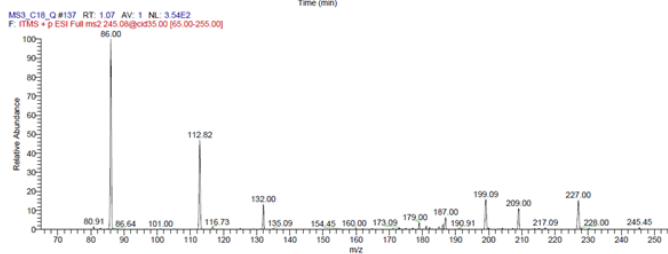

\*Note: Chromatogram is MS<sup>2</sup> total ion chromatogram for 245.08 isolation mass due to low abundance of parent mass in full scan

MS/MS spectra  
Spectrum similarity score: 0.429

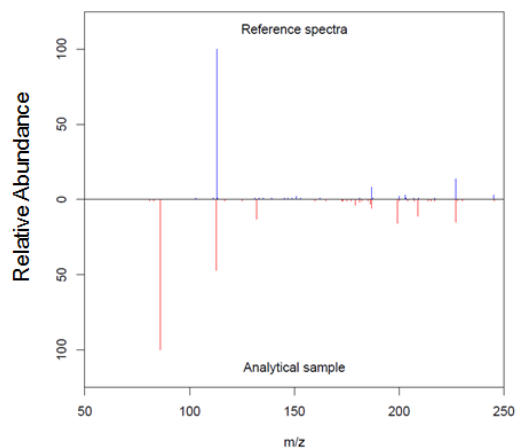

Reference spectra obtained on Thermo LTQ FTICR, Uridine (99%), SigmaAldrich

**Caffeine ( $H^+$ ,  $m/z$  195.0877, 35s)**

Caffeine was confirmed by coelution and MS/MS matching standard.

**Caffeine M+H,  $m/z$  = 195.0877**

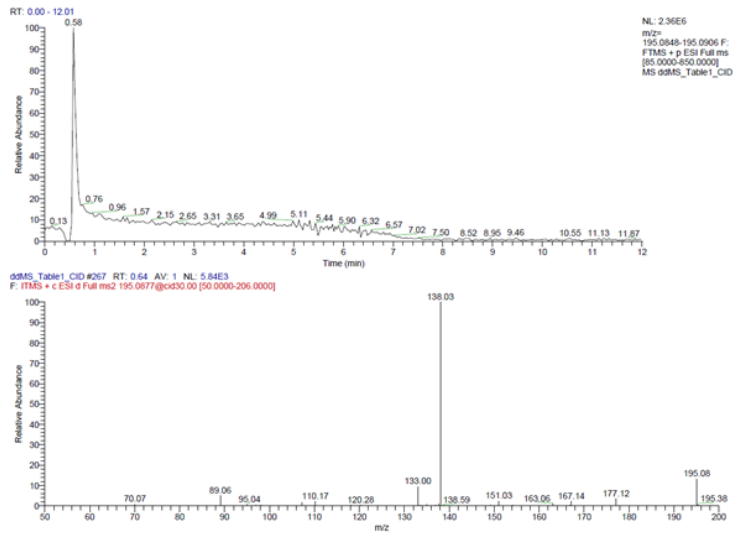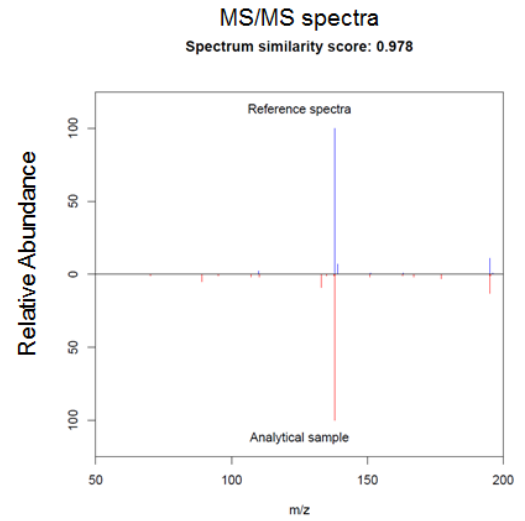

Reference spectra obtained on Thermo LTQ FTICR, Caffeine (99%), Sigma Aldrich

## Chlorobenzoic acid (M-H, $m/z$ 157.0051, 59s)

Chlorobenzoic acid was confirmed by coelution and MS/MS matching standard. Note that the peak was very low intensity so that fragmentation of other ions within the isolation window interfered with similarity scoring. Method of addition with authentic standard, along with MS/MS of added standard, was consistent with the interpretation as shown.

### Chlorobenzoate M-H, $m/z$ = 154.9904

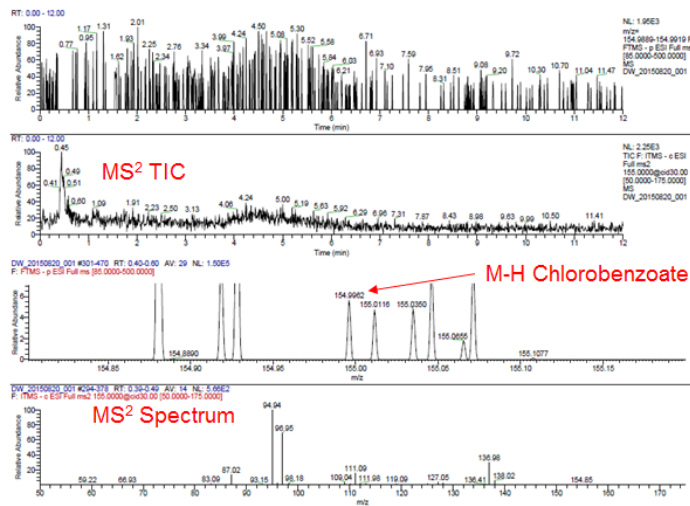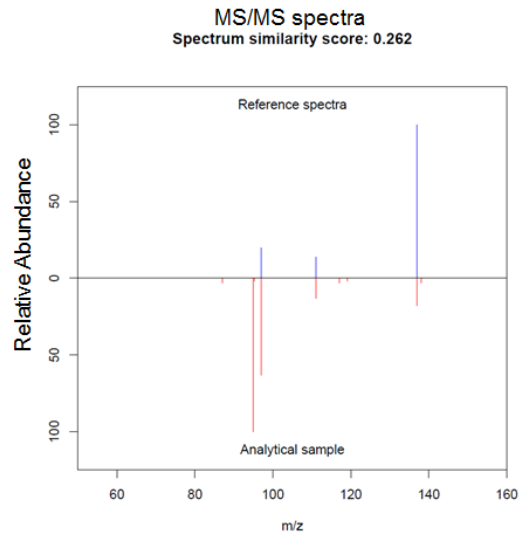

Reference spectra obtained on Thermo Fusion, Chlorobenzoate (99%), Sigma Aldrich

## Chlorophenylacetic acid (M-H, $m/z$ 171.0206, 64s)

Chlorophenylacetic acid was confirmed by coelution and MS/MS matching standard. Note that the peak was very low intensity so that fragmentation of other ions within the isolation window interfered with similarity scoring. Method of addition with authentic standard, along with MS/MS of added standard, was consistent with the interpretation as shown.

## Chlorophenylacetic acid M-H, $m/z$ = 169.0062

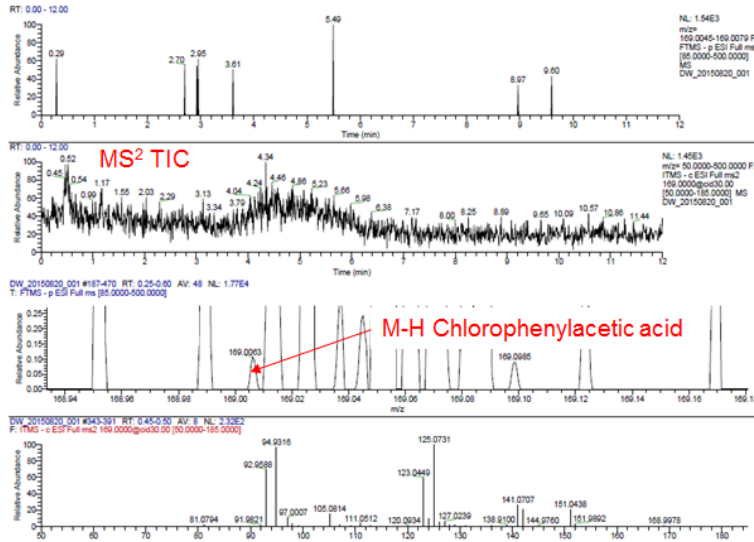

MS/MS spectra  
Spectrum similarity score: 0.526

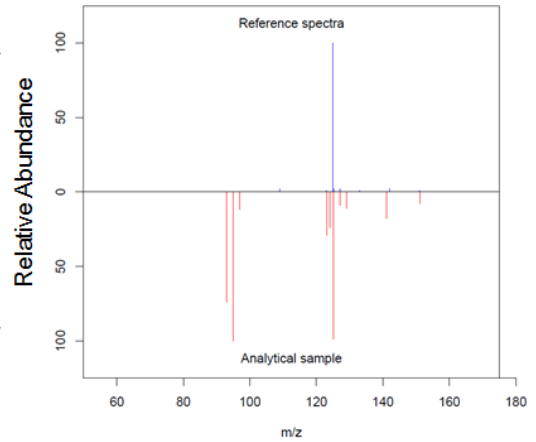

Due to low abundance of parent ion, MS<sup>2</sup> spectra was in negative mode and compared to retention time obtained in positive mode.

Reference spectra obtained on Thermo Fusion, Chlorophenylacetic acid (99%), SigmaAldrich

## Chlorsulfuron ( $H^+$ , $m/z$ 358.0371, 345s)

Data are consistent with chlorsulfuron identification by coelution and MS/MS of added standard, but low intensity and fragmentation of other ions within the isolation window interfered absolute identification by MS/MS of samples without addition.

### Chlorsulfuron M+H, $m/z = 358.0371$

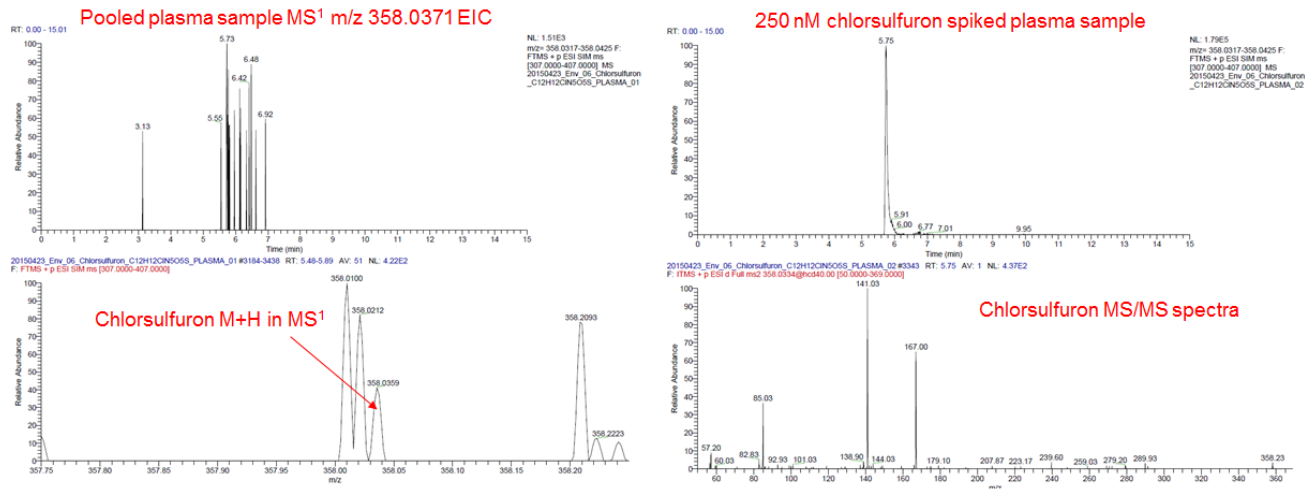

Reference spectra obtained on Thermo Fusion, Chlorsulfuron (99%), Sigma Aldrich

## Dibutylphthalate ( $H^+$ , $m/z$ 279.1580, 391s)

Dibutylphthalate was confirmed by coelution and MS/MS matching standard. Note that the peak coeluted with other chemicals in the isolation window so that fragmentation of other ions interfered with similarity scoring. Concern is frequently expressed that analysis of dibutylphthalate is invalid because of potential contamination due to contact of samples with plastics. The data reported in the present analysis represent the results of what was measured in the samples without any knowledge of how the phthalates were introduced into the plasma.

### Dibutylphthalate M+H, $m/z$ = 279.1580

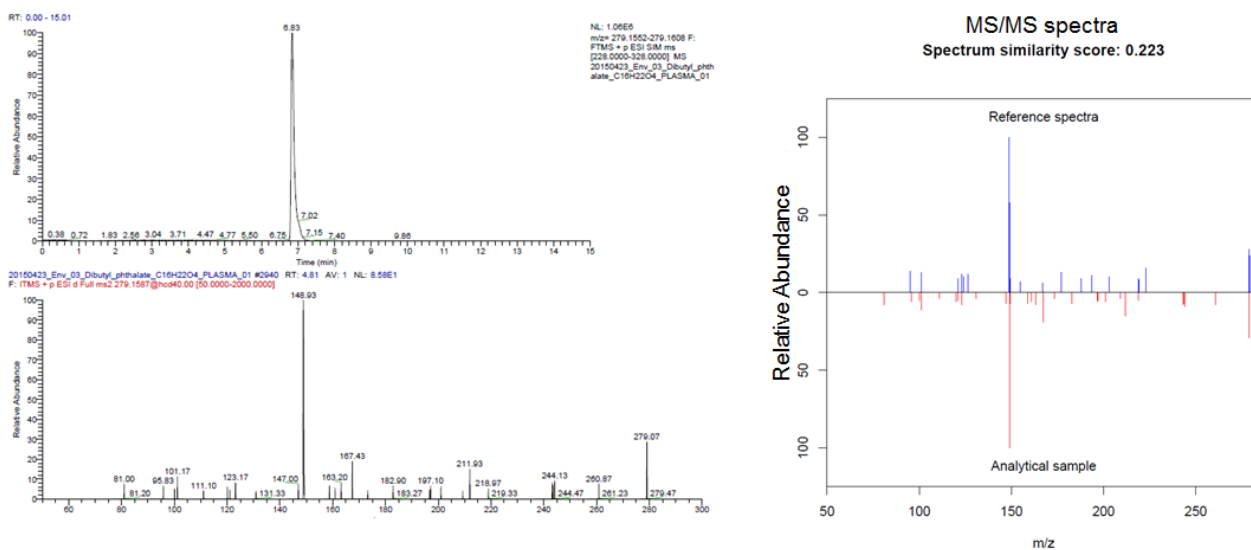

Reference spectra obtained on Thermo Fusion, Dibutyl Phthalate (99%), Sigma Aldrich



## Dipropylphthalate ( $H^+$ , $m/z$ 251.1266, 280s)

Dipropylphthalate was confirmed by coelution and MS/MS matching standard. Concern is frequently expressed that analysis of phthalates in plasma is invalid because of potential contamination due to contact of samples with plastics. The data reported in the present analysis represent the results of what was measured in the samples without any knowledge of how the phthalates were introduced into the plasma.

### Dipropylphthalate M+H, $m/z$ = 251.1266

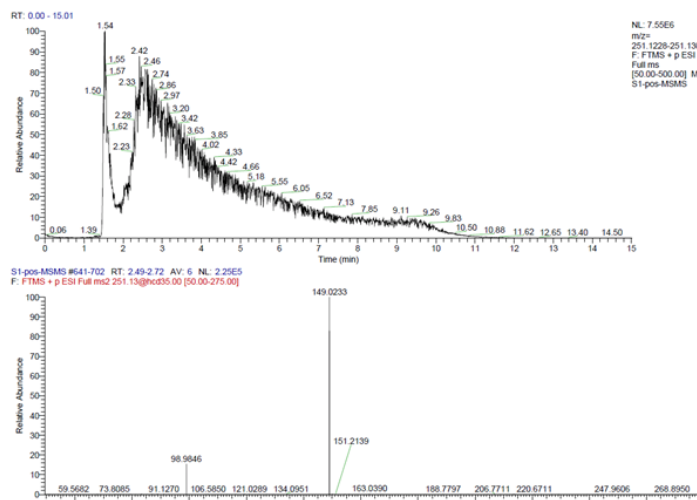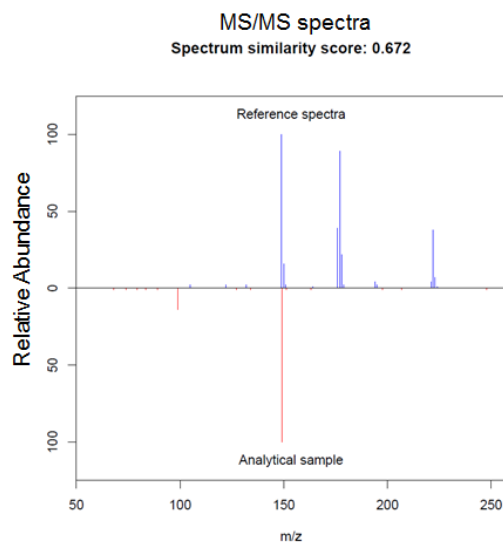

Reference spectra obtained on Thermo LTQ FTICR, Dipropylphthalate (98%), Sigma Aldrich

## Hippuric acid ( $H^+$ , $m/z$ 180.0657, 140s)

Hippuric acid was confirmed by coelution and MS/MS matching standard. Double-blind independent analysis (Emory platform vs Metabolon) on 50 marmoset samples showed a significant association with Pearson  $r = 0.56$ .

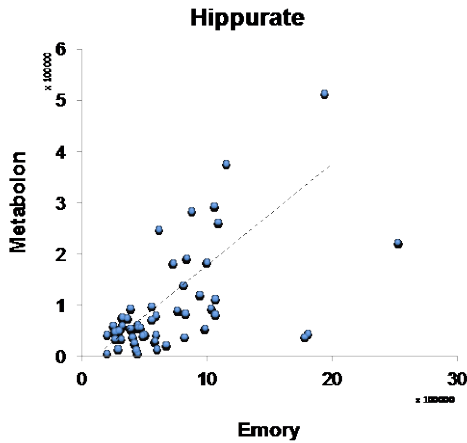

## Hippuric acid M+H, $m/z = 180.0657$

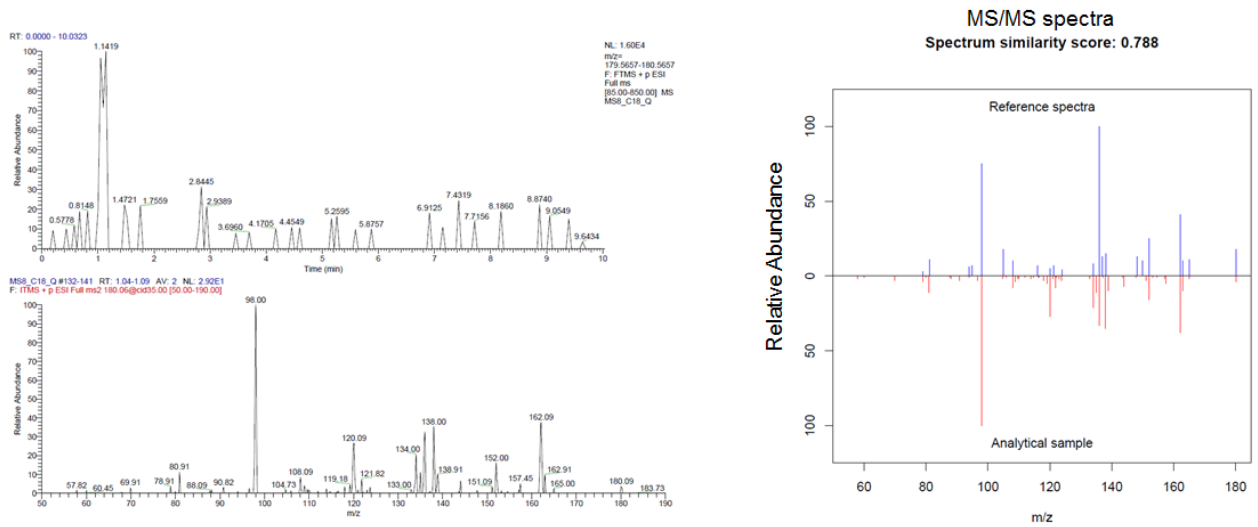

Reference spectra obtained on Thermo LTQ FTICR, Hippuric acid (98%), Sigma Aldrich

**Octylphenol (M-H,  $m/z$  207.1734, 282s)**

Octylphenol ion intensity was too low in positive ESI to obtain useful MS/MS spectra. Corresponding analysis with negative ESI was used to confirm identity by coelution and MS/MS matching standard.

**Octylphenol M-H,  $m/z$  = 205.1598**

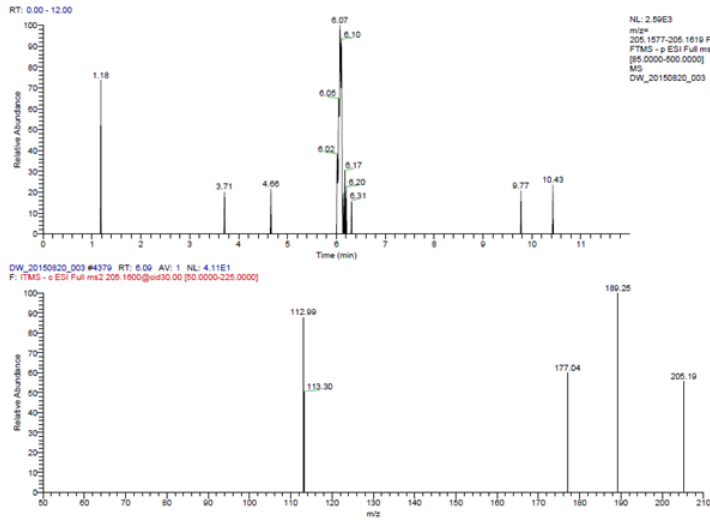

**MS/MS spectra**  
Spectrum similarity score: 0.376

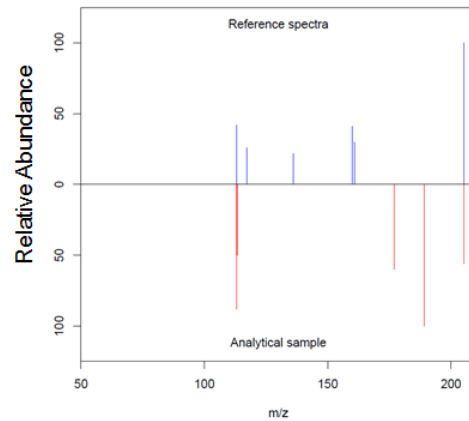

Due to low abundance of parent ion, MS/MS spectra was in negative mode and compared to retention time obtained in positive mode.

Reference spectra obtained on Thermo Fusion, Octylphenol(98%), Sigma Aldrich

## Pirimicarb ( $H^+$ , $m/z$ 239.1483, 552s)

Pirimicarb identity was established in earlier research (Park YH, Lee K, Soltow QA, et al. High-performance metabolic profiling of plasma from seven mammalian species for simultaneous environmental chemical surveillance and bioeffect monitoring. *Toxicology*. 2012;295(1-3):47-55. doi:10.1016/j.tox.2012.02.007.) and was confirmed by coelution and MS/MS comparison to authentic standard.

### Pirimicarb M+H, $m/z$ = 239.1483

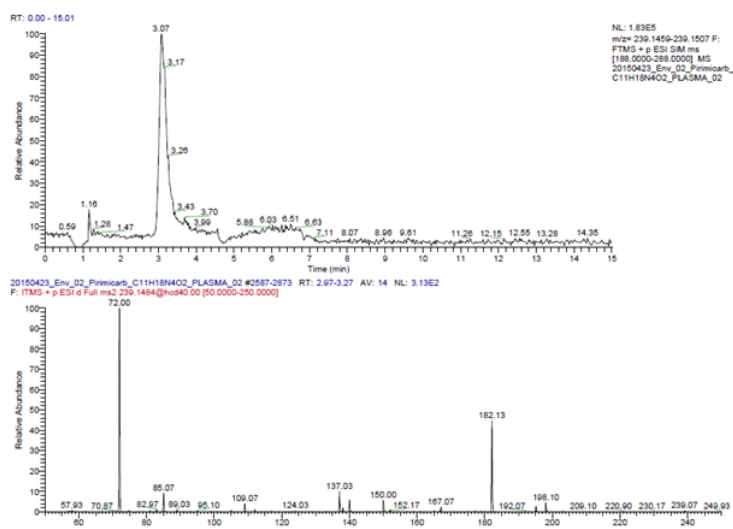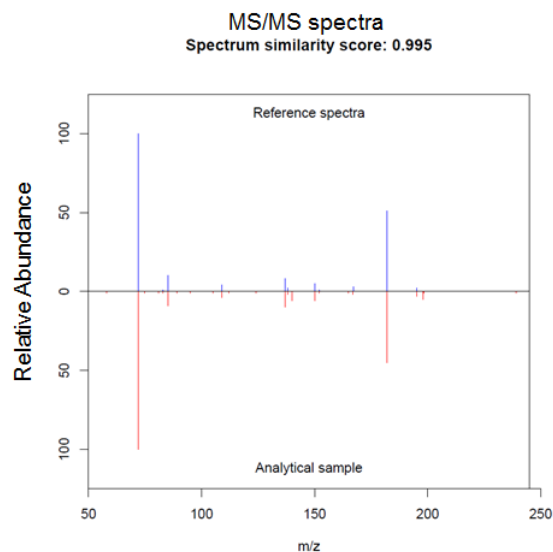

Reference spectra obtained on Thermo Fusion, Pirimicarb (99%), Sigma Aldrich

Styrene (H<sup>+</sup>, m/z 105.0693, 298s)

Styrene was confirmed by coelution and MS/MS relative to authentic standard.

Styrene M+H, m/z = 105.0692

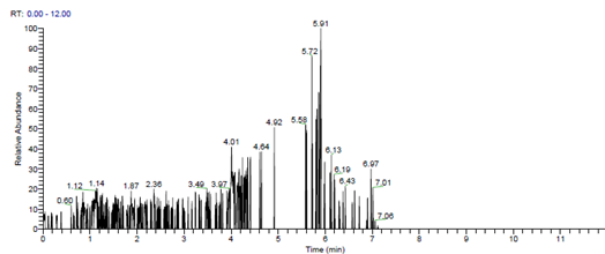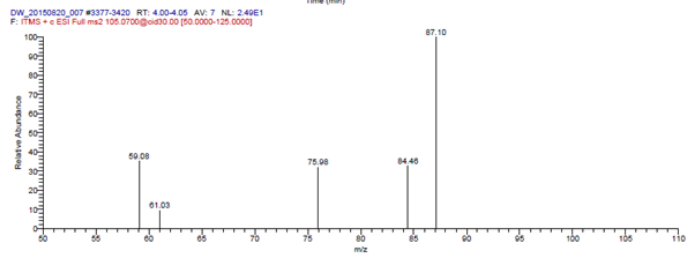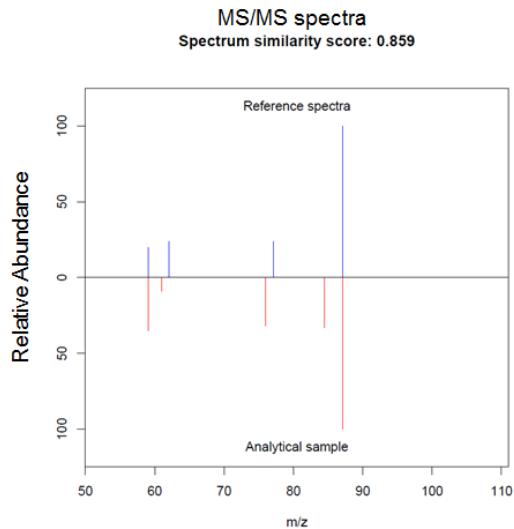

Reference spectra obtained on Thermo Fusion, Styrene (99%), Sigma Aldrich

## Tetraethylene glycol ( $H^+$ , $m/z$ 195.1211, 38s)

Tetraethylene glycol was confirmed by coelution and MS/MS matching standard.

### Tetraethylene glycol M+H, $m/z$ = 195.1211

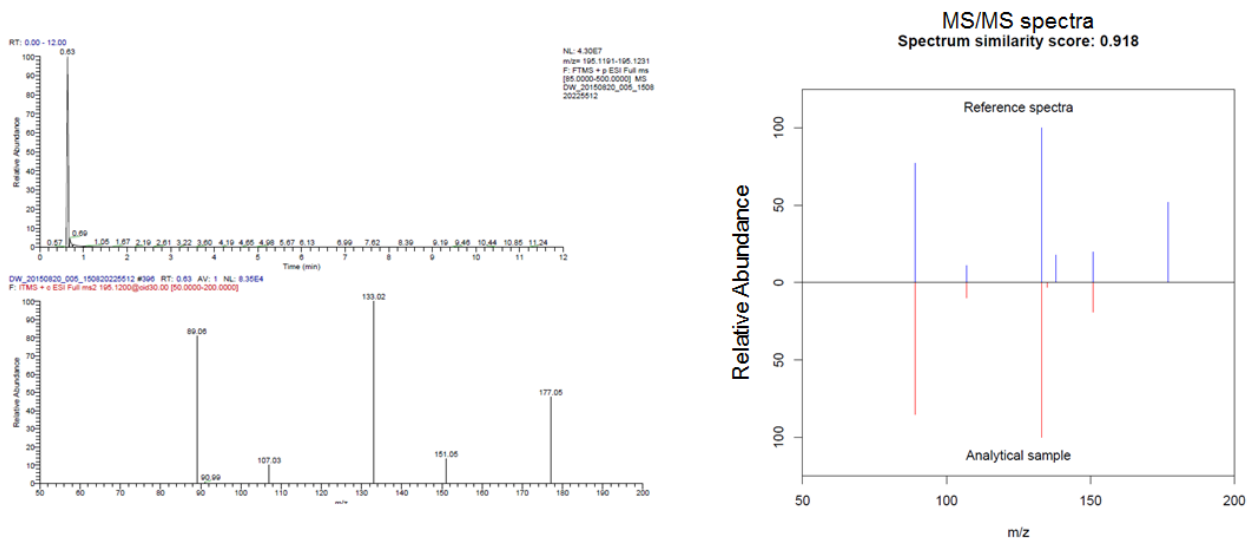

Reference spectra obtained on Thermo Fusion, Tetraethylene glycol (99%), Sigma Aldrich

## Triethylphosphate ( $H^+$ , $m/z$ 183.0773, 329s)

Triethylphosphate was confirmed by coelution and MS/MS matching standard.

### Triethylphosphate M+H, $m/z$ = 183.0773

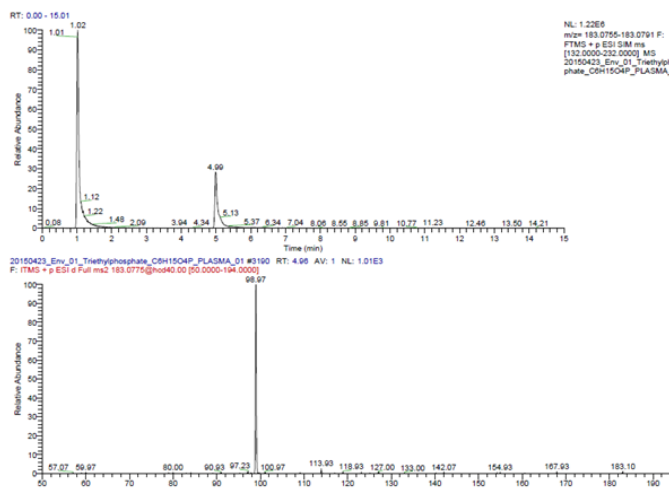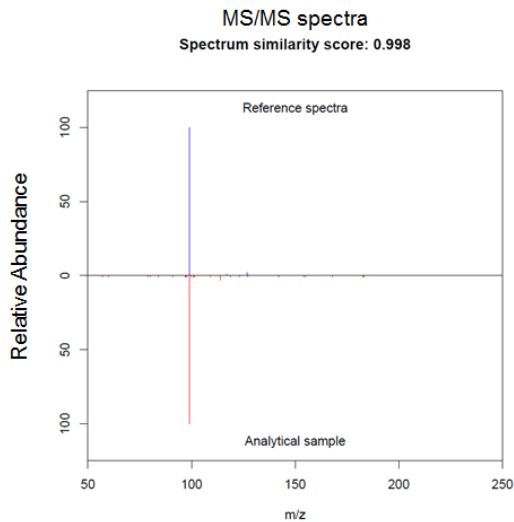

Reference spectra obtained on Thermo Fusion, Triethylphosphate (99.8%), SigmaAldrich

## Triphenylphosphate ( $H^+$ , $m/z$ 327.0765, 359s)

Triphenylphosphate was confirmed by coelution and MS/MS matching standard.

### Triphenylphosphate M+H, $m/z = 327.0765$

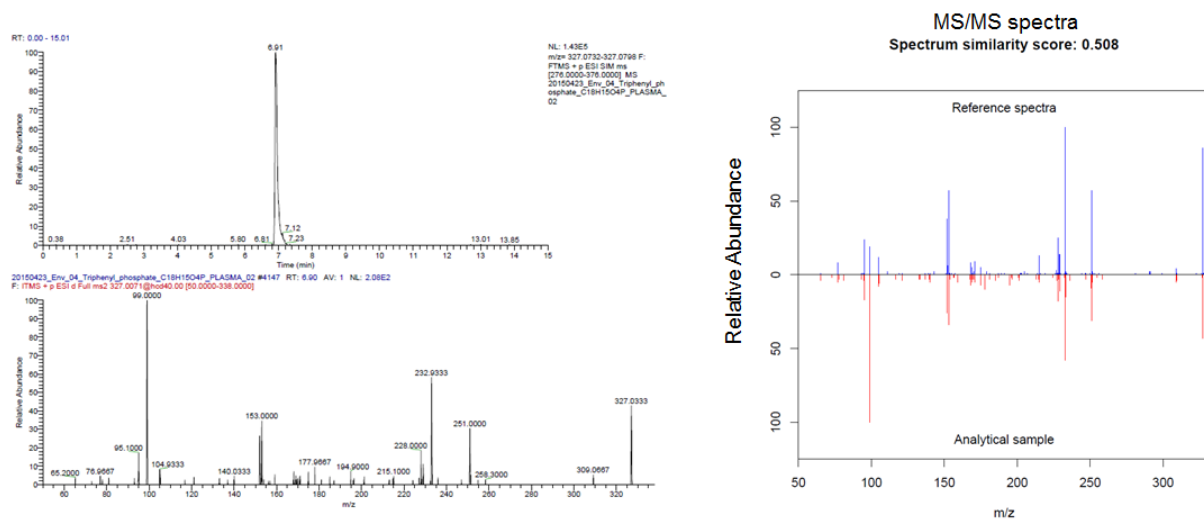

Reference spectra obtained on Thermo Fusion, Triphenylphosphate (99%), Sigma Aldrich



**Tris(1-chloro-2-propyl) phosphate ( $H^+$ ,  $m/z$  327.0081, 330s)**

Tris(1-chloro-2-propyl) phosphate was confirmed by coelution and MS/MS matching standard.

**Tris(1-chloro-2-propyl) phosphate M+H,  $m/z$  = 327.0081**

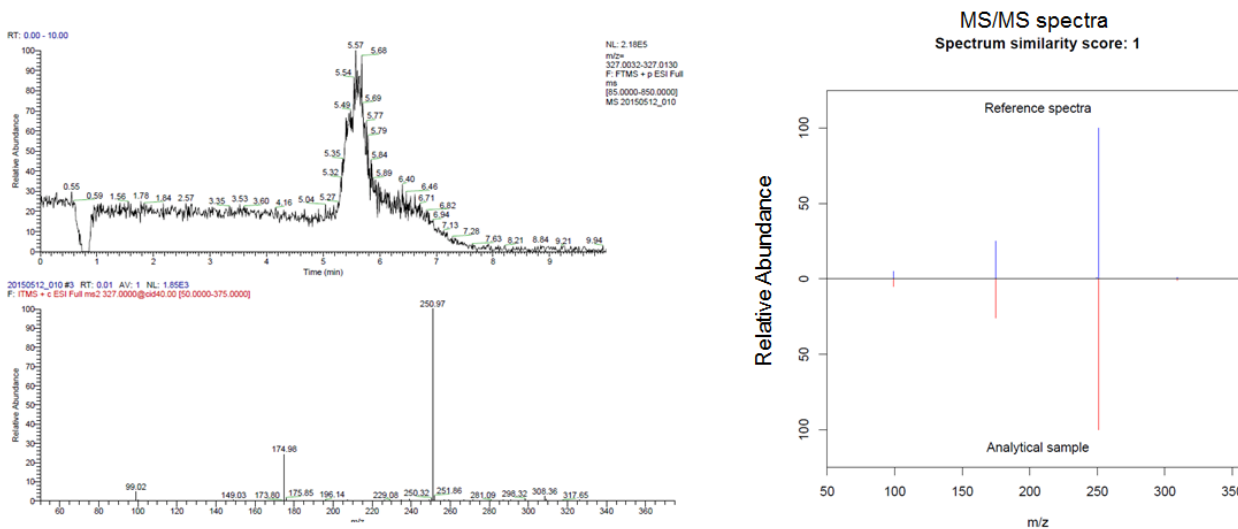

Reference spectra obtained on Thermo Fusion, Tris(3-chloropropyl)phosphate (99%), Accustandard

## Xylylcarb (H<sup>+</sup>, m/z 180.1018, 264s)

Data are consistent with xylylcarb identification by coelution and MS/MS of added standard, but low intensity and fragmentation of other ions within the isolation window interfered absolute identification by MS/MS of samples without addition..

### Xylylcarb M+H, m/z = 180.1018

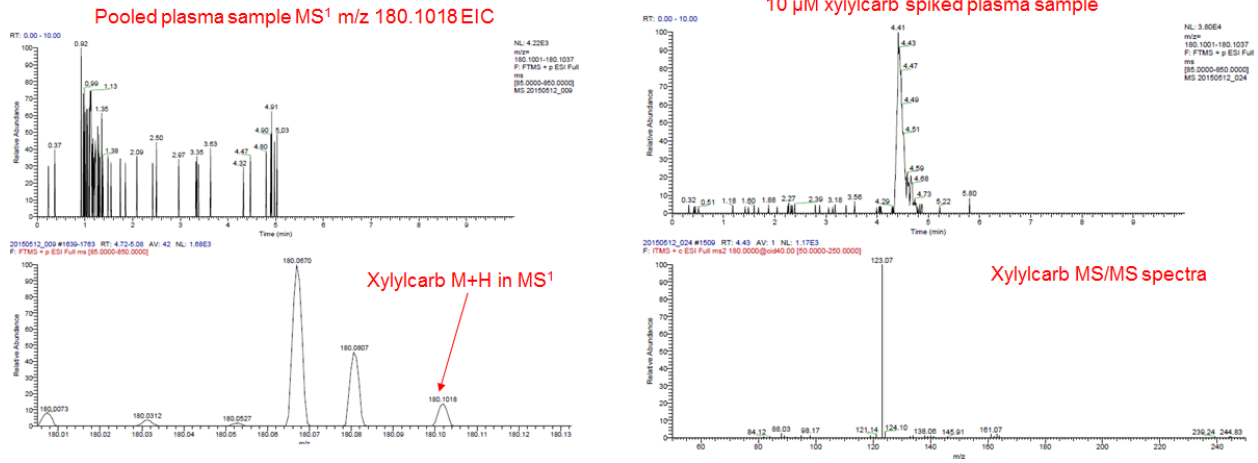

Reference spectra obtained on Thermo Fusion, Xylylcarb (99%), HPC Standards
